# Supplementary material for: Impact-resistant carbon nanotube woven films: a molecular dynamics study
Source: Royal Society of Chemistry journal article supplement (doi:10.1039/d0nr07421g), 2021-01-01
Supplement: d0nr07421g1.pdf [file d0nr07421g1.pdf]

## Supporting information

### Impact-resistant carbon nanotube woven films: A molecular dynamics study

Fan Wu<sup>1</sup>, Yushun Zhao<sup>1</sup>, Yifan Zhao<sup>1</sup>, Yue Zhao<sup>1</sup>, Chao Sui<sup>1\*</sup>, Xiaodong He<sup>1,2</sup>, Chao Wang<sup>1\*</sup>, and Huifeng Tan<sup>1\*</sup>

<sup>1</sup>National Key Laboratory of Science and Technology for National Defence on Advanced Composites in Special Environments, Harbin Institute of Technology, Harbin 150001, PR China

<sup>2</sup>Shenzhen STRONG Advanced Materials Research Institute Co., Ltd, Shenzhen 518000, PR China

**E-mail:** suichao@hit.edu.cn; tanhf@hit.edu.cn; chaowang@hit.edu.cn

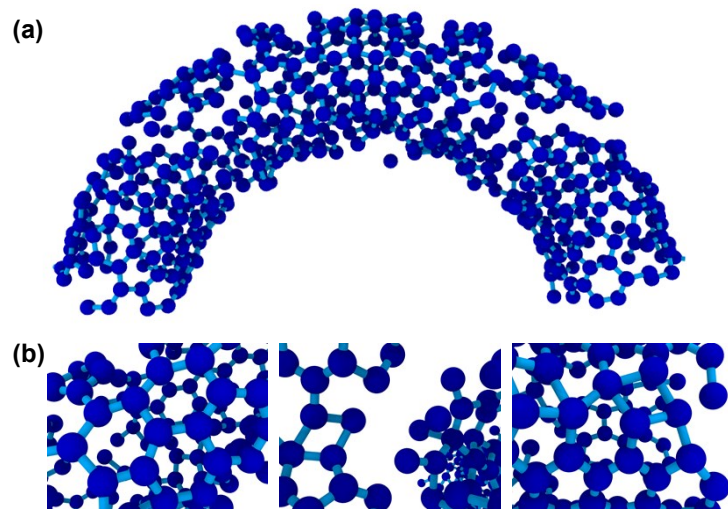

Figure S1. (a) The unstable configuration of SWCNT under large bending angle. (b)

Enlarged figures for local fracture failure.

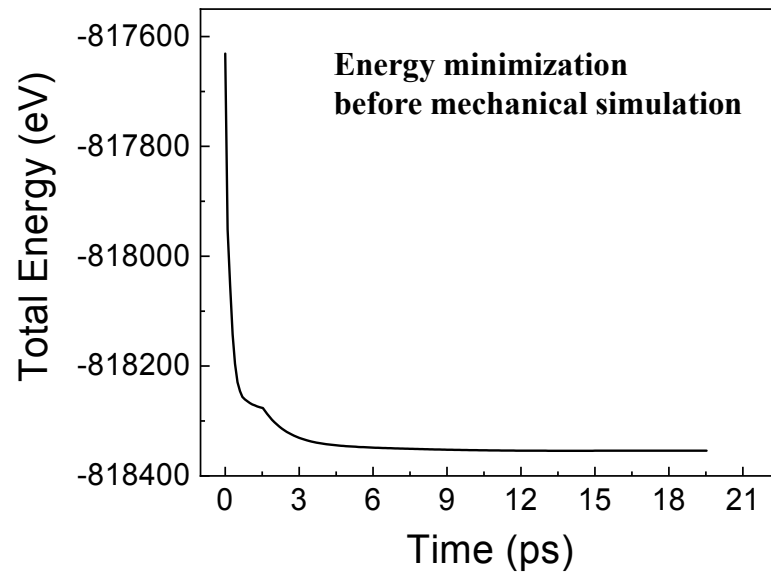

Figure S2. The energy minimization curve of SWFs before tensile and impacting tests.

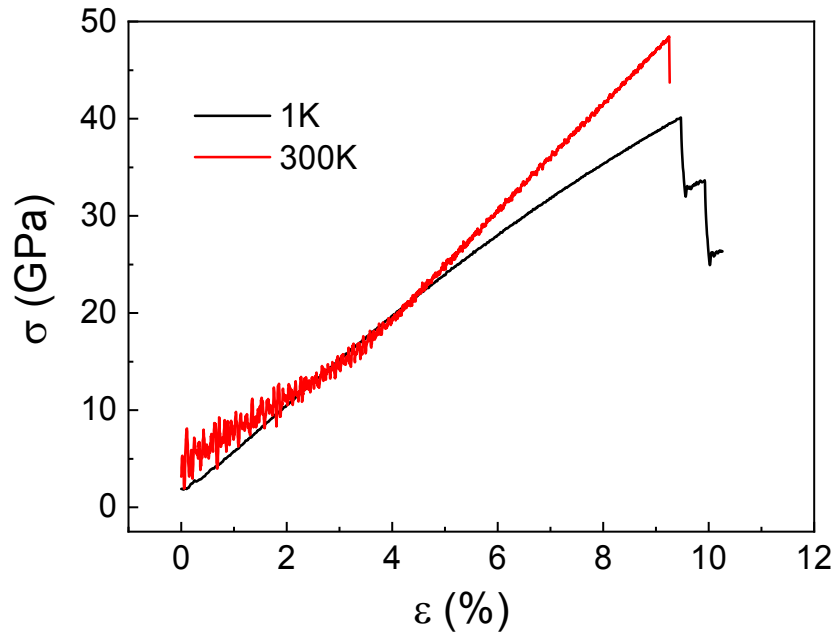

Figure S3. Tensile stress-strain curves of SWFs with  $\theta=15^\circ$  at  $T=1\text{K}$  and  $T=300\text{K}$ , respectively.

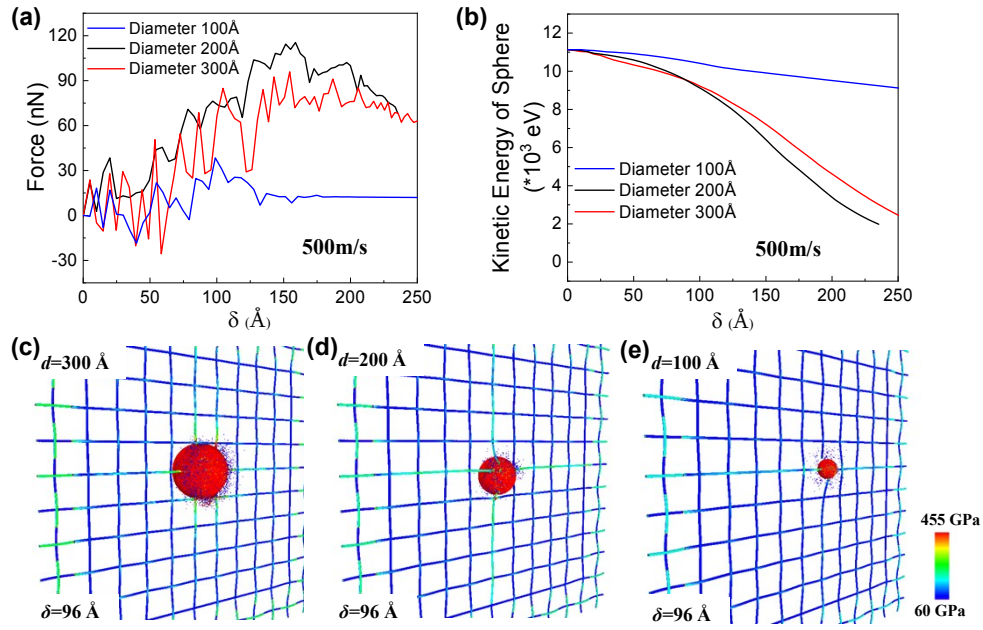

Figure S4. (a) The force  $F$ -displacement  $\delta$  of projectile acting on SWFs with different diameters at  $v_i=500\text{m/s}$ . (b) Kinetic energy dissipation of the projectile with different diameters at  $v_i=500\text{m/s}$  during the impact process. (c-e) The impacting snapshots of projectile with  $D=100$  Å, 200 Å and 300 Å at  $\delta=96$  Å.

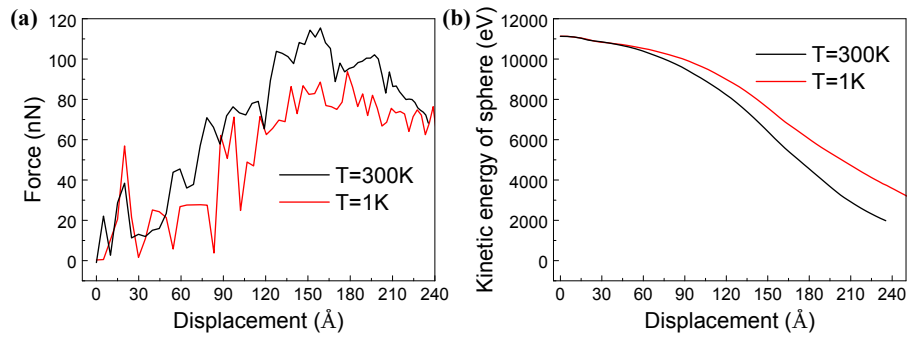

Figure S5. (a) The force  $F$ -displacement  $\delta$  of SP acting on single-layer SWFs with  $T=1\text{K}$  and  $300\text{K}$  at  $v_i=500\text{m/s}$ . (b) Kinetic energy dissipation of the SP with  $T=1\text{K}$  and  $300\text{K}$  at  $v_i=500\text{m/s}$  during the impact process.
